# Supplementary material for: DNA aptamers for common buffer molecules: possibility of buffer interference in SELEX
Source: Royal Society of Chemistry journal article supplement (doi:10.1039/d4ob00622d), 2024-01-01
Supplement: d4ob00622d1.pdf [file d4ob00622d1.pdf]

## Electronic supplementary information

### **DNA Aptamers for Common Buffer Molecules: Possibility of Buffer Interference in SELEX**

Yuzhe Ding<sup>a</sup>, Ziyu Zhang<sup>a</sup>, Yunus Kaiyum, Yicheng Heng, Philip E. Johnson and Juewen Liu\*

*Y.D. and Z.Z. contributed equally to this work.*

<sup>a</sup> *Department of Chemistry, Waterloo Institute for Nanotechnology, University of Waterloo, Waterloo, Ontario, N2L 3G1, Canada*

*E-mail: [liujw@uwaterloo.ca](mailto:liujw@uwaterloo.ca)*

<sup>b</sup> *Department of Chemistry, York University, 4700 Keele Street, Toronto, Ontario M3J 1P3, Canada*

**Table S1.** The DNA sequence used in this work

| DNA names                | Sequences (from 5' to 3')                         |
|--------------------------|---------------------------------------------------|
| N36 library              | GGAGGCTCTCGGGACGAC-N36-GTCGTCCCGATCACTTGAATGGTCT  |
| Biot-Column              | GTCGTCCCGAGAGCCATA /3BioTEG/                      |
| Forward primer (FP)      | GGAGGCTCTCGGGACGAC                                |
| Biot-Reverse primer (RP) | /5Biosg/ AGACCATTCAAGTGATCGGGACG                  |
| T14N1                    | GACGAC GTGGGGGAGTCTTCGCTTGCTCATCCGCACACCAT GTCGTC |
| Tris1Δ4                  | AC GTGGGGGAGTCTTCGCTTGCTCATCCGCACACCAT GT         |
| Tris1Δ7                  | TGGGGGAGTCTTCGCTTGCTCATCCGCACACCA                 |
| Tris1-TG                 | GACGAC GTGGGGGATGCTTCGCTTGCTCATCCGCACACCAT GTCGTC |
| R10G2                    | GACGAC ACCAACCGGTATTTCCGGTCTGTAATGGAT GTCGTC      |

Note: /5Biosg/ is biotinylation at the 5'-end, /3BioTEG/ is biotinylation at the 3'-end. The reverse primer did not fully cover the 3' side of the fixed region, leaving two nucleotides unpaired

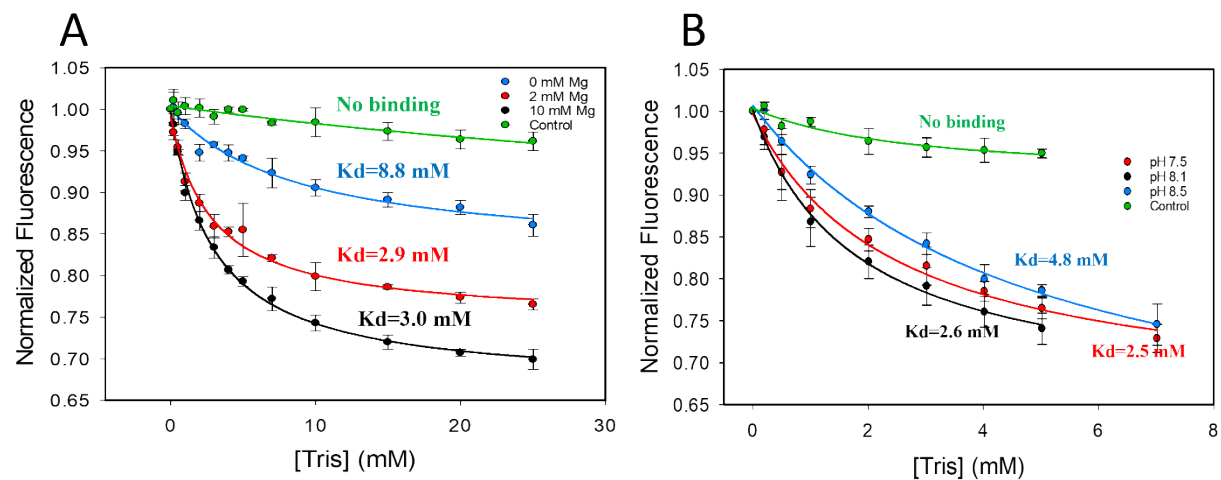**Figure S1.** The ThT fluorescence titration curve of T14N1 aptamer in different (A) Mg<sup>2+</sup> concentration and (B) pH conditions. R10G2 used for control experiments.
